# Supplementary material for: CO2/NOx storage and reduction (CNSR) technology—a new concept for flue gas treatment
Source: Royal Society of Chemistry journal article supplement (doi:10.1039/d4ey00235k), 2025-01-01
Supplement: d4ey00235k1.pdf [file d4ey00235k1.pdf]

## Supporting Information

### **CO<sub>2</sub>/NO<sub>x</sub> storage and reduction (CNSR) technology — a new concept for flue gas treatment**

Jiaqi Wei <sup>1,2</sup>, Yanshan Gao<sup>1,2,\*</sup>, Cheng Zhang <sup>1,2</sup>, Qiang Wang<sup>1,2,\*</sup>

<sup>1</sup> College of Environmental Science and Engineering, Beijing Forestry University,  
Beijing 100083, China

<sup>2</sup> State Key Laboratory of Efficient Production of Forest Resources, Beijing Forestry  
University, Beijing 100083, China

\*Corresponding authors:

Associate Professor Yanshan Gao (E-mail: [yanshan\\_gao@bjfu.edu.cn](mailto:yanshan_gao@bjfu.edu.cn))

Professor Qiang Wang (E-mail: [qiangwang@bjfu.edu.cn](mailto:qiangwang@bjfu.edu.cn))

## Calculation formula

The NO<sub>x</sub> storage capacity (NSC) in the storage period, as well as NH<sub>3</sub>, N<sub>2</sub>O, NO<sub>x</sub>-des, and N<sub>2</sub> yield during the hydrogenation period, were calculated using Eqs. (S1)-(S5). The CH<sub>4</sub>, CO, desorbed CO<sub>2</sub> yield during the hydrogenation period and CO<sub>2</sub> adsorption capacity (C<sub>CO2</sub>) were calculated using Eqs. (S6)-(S9). The N<sub>2</sub> production was calculated based on the principle of material balance, due to the limitation of N<sub>2</sub> detection by the MKS-2000 instrument. Additionally, the NO<sub>x</sub> storage efficiency (NSE) was calculated using Eq. (S10).

$$\text{NSC } (\mu\text{mol g}^{-1}) = \frac{\int_{t_1}^{t_2} (\text{NO}_{x \text{ in}} - \text{NO}_{x \text{ out}}) dt \times F_w \times 10^{-3}}{22.4\text{m}} \quad (\text{S1})$$

$$Y_{\text{NH}_3} (\mu\text{mol g}^{-1}) = \frac{\int_{t_3}^{t_4} \text{NH}_3(t) dt \times F_w \times 10^{-3}}{22.4\text{m}} \quad (\text{S2})$$

$$Y_{\text{N}_2\text{O}} (\mu\text{mol g}^{-1}) = \frac{\int_{t_3}^{t_4} \text{N}_2\text{O}(t) dt \times F_w \times 10^{-3}}{22.4\text{m}} \quad (\text{S3})$$

$$Y_{\text{NO}_x \text{ - des}} (\mu\text{mol g}^{-1}) = \frac{\int_{t_3}^{t_4} \text{NO}_x(t) dt \times F_w \times 10^{-3}}{22.4\text{m}} \quad (\text{S4})$$

$$Y_{\text{N}_2} (\mu\text{mol g}^{-1}) = \frac{\text{NO}_{x \text{ - s}} - Y_{\text{NO}_x \text{ - des}} - Y_{\text{NH}_3} - 2Y_{\text{N}_2\text{O}}}{2} \quad (\text{S5})$$

$$Y_{\text{CH}_4} (\mu\text{mol g}^{-1}) = \frac{\int_{t_3}^{t_4} \text{CH}_4(t) dt \times F_w \times 10^{-3}}{22.4\text{m}} \quad (\text{S6})$$

$$Y_{\text{CO}} (\mu\text{mol g}^{-1}) = \frac{\int_{t_3}^{t_4} \text{CO}(t) dt \times F_w \times 10^{-3}}{22.4m} \quad (\text{S7})$$

$$Y_{\text{CO}_2\text{-des}} (\mu\text{mol g}^{-1}) = \frac{\int_{t_3}^{t_4} \text{CO}_2(t) dt \times F_w \times 10^{-3}}{22.4m} \quad (\text{S8})$$

$$C_{\text{CO}_2} (\mu\text{mol g}^{-1}) = Y_{\text{CO}_2\text{-des}} + Y_{\text{CH}_4} + Y_{\text{CO}} \quad (\text{S9})$$

$$\text{NSE}(\%) = \frac{\int_{t_1}^{t_2} (\text{NO}_{x,\text{in}} - \text{NO}_{x,\text{out}}) dt}{\int_{t_1}^{t_2} \text{NO}_{x,\text{in}} dt} \times 100\% \quad (\text{S10})$$

Where  $t_1$  and  $t_2$  (min) are the beginning and ending times of the adsorption period, while  $t_3$  and  $t_4$  are the beginning and ending times of the hydrogenation period, respectively.  $F_w$  refers to total flow rate (200 mL min<sup>-1</sup>) of experimental gases.  $m$  is the mass of materials (0.3 g) and 22.4 represents the molar volume of gas (L mol<sup>-1</sup>).

**Table S1** The specific surface area ( $S_{\text{BET}}$ ), pore volume ( $V_p$ ) and average pore size ( $d_p$ ) of synthesized  $\text{Ni}_3\text{Al}_1\text{O}_x$ ,  $\text{Pt}/\text{Ni}_3\text{Al}_1\text{O}_x$ ,  $\text{K-Pt}/\text{Ni}_3\text{Al}_1\text{O}_x$  and  $\text{K-Pt}/\text{Ni}_3\text{Al}_1\text{O}_x\text{-R}$  samples.

| Sample                                                  | $S_{\text{BET}}$<br>( $\text{m}^2 \text{g}^{-1}$ ) | Pore Volume ( $\text{cm}^3 \text{g}^{-1}$ ) |                    |                   | Pore Radius<br>( $\text{\AA}$ ) |
|---------------------------------------------------------|----------------------------------------------------|---------------------------------------------|--------------------|-------------------|---------------------------------|
|                                                         |                                                    | $V_{\text{total}}$                          | $V_{\text{micro}}$ | $V_{\text{meso}}$ |                                 |
| $\text{Ni}_3\text{Al}_1\text{O}_x$                      | 180                                                | 0.601                                       | 0.076              | 0.525             | 66.8                            |
| $\text{Pt}/\text{Ni}_3\text{Al}_1\text{O}_x$            | 190.9                                              | 0.736                                       | 0.082              | 0.654             | 77.1                            |
| $\text{K-Pt}/\text{Ni}_3\text{Al}_1\text{O}_x$          | 131.1                                              | 0.525                                       | 0.057              | 0.468             | 80                              |
| $\text{K-Pt}/\text{Ni}_3\text{Al}_1\text{O}_x\text{-R}$ | 50.8                                               | 0.460                                       | 0.028              | 0.432             | 181.4                           |

**Table S2** H<sub>2</sub> consumption obtained by H<sub>2</sub>-TPR.

| Sample                                              | H <sub>2</sub> Consumption <sup>a</sup> (mmol g <sup>-1</sup> ) |
|-----------------------------------------------------|-----------------------------------------------------------------|
| Ni <sub>3</sub> Al <sub>1</sub> O <sub>x</sub>      | 5.45                                                            |
| Pt/Ni <sub>3</sub> Al <sub>1</sub> O <sub>x</sub>   | 5.51                                                            |
| K-Pt/Ni <sub>3</sub> Al <sub>1</sub> O <sub>x</sub> | 5.96                                                            |

<sup>a</sup>Calculated based on H<sub>2</sub>-pulse results

**Table S3** The summary of integrated CO<sub>2</sub> capture and methanation (ICCM) performance.

| Samples                                                                              | Adsorption conditions                                                                                                        | Methanation conditions                                                       | CO <sub>2</sub> Uptake (μmol g <sup>-1</sup> ) | CO <sub>2</sub> Conv. (%) | CH <sub>4</sub> Sel. (%) | CH <sub>4</sub> Yield (μmol g <sup>-1</sup> ) | Cycle | Ref. |
|--------------------------------------------------------------------------------------|------------------------------------------------------------------------------------------------------------------------------|------------------------------------------------------------------------------|------------------------------------------------|---------------------------|--------------------------|-----------------------------------------------|-------|------|
| 0.5%Ni/CeO <sub>2</sub> -CaO (0.3 g)                                                 | 15%CO <sub>2</sub> /N <sub>2</sub> , 50 mL min <sup>-1</sup> , 60 mins, T=650 °C                                             | Pure H <sub>2</sub> , 50 mL min <sup>-1</sup> , 60 mins, T=650 °C            | –                                              | 50.4                      | 85.8                     | 1540 mmol g <sup>-1</sup> Ni                  | –     | 1    |
| 10Na <sub>2</sub> CO <sub>3</sub> -10Ni/Al <sub>2</sub> O <sub>3</sub> (1 g)         | 10%CO <sub>2</sub> /Ar, 1200 mL min <sup>-1</sup> , 1 min, T=400 °C                                                          | 10% H <sub>2</sub> /Ar, 1200 mL min <sup>-1</sup> , 2 mins, T=400 °C         | 210                                            | –                         | –                        | 185                                           | 20    | 2    |
| 10% Ni-6.1% Na <sub>2</sub> O/Al <sub>2</sub> O <sub>3</sub> (1 g)                   | 7.5%CO <sub>2</sub> /N <sub>2</sub> , 100 mL min <sup>-1</sup> , 20 mins, T=320 °C                                           | 15%H <sub>2</sub> /N <sub>2</sub> , 200 mL min <sup>-1</sup> , 1 h, T=320 °C | 389.2                                          | 71                        | –                        | 276.2                                         | –     | 3    |
| 5% Ru-6.1% Na <sub>2</sub> O/Al <sub>2</sub> O <sub>3</sub> (1 g)                    | 7.5%CO <sub>2</sub> /4.5% O <sub>2</sub> /15% H <sub>2</sub> O/N <sub>2</sub> , 100 mL min <sup>-1</sup> , 20 mins, T=320 °C | 15%H <sub>2</sub> /N <sub>2</sub> , 200 mL min <sup>-1</sup> , 1 h, T=320 °C | 393.5                                          | 75                        | –                        | 291.1                                         | –     | 3    |
| 4%Ru-8%Na <sub>2</sub> CO <sub>3</sub> -8%CaO/γ-Al <sub>2</sub> O <sub>3</sub> (1 g) | 1.5%CO <sub>2</sub> /Ar, 1200 mL min <sup>-1</sup> , 1 min, T=340 °C                                                         | 10%H <sub>2</sub> /Ar, 1200 mL min <sup>-1</sup> , 2 mins, T=340 °C          | 243                                            | –                         | –                        | 241                                           | 7     | 4    |
| 4%Ru-8%Na <sub>2</sub> CO <sub>3</sub> -8%CaO/γ-Al <sub>2</sub> O <sub>3</sub> (1 g) | 1.5%CO <sub>2</sub> /10%O <sub>2</sub> /400 ppm NO <sub>x</sub> /Ar, 1200 mL min <sup>-1</sup> , 1 min, T=340 °C             | 10%H <sub>2</sub> /Ar, 1200 mL min <sup>-1</sup> , 2 mins, T=340 °C          | 209                                            | –                         | –                        | 196                                           | –     | 4    |
| Ru10CaO/Al <sub>2</sub> O <sub>3</sub> (1 g)                                         | 1.4%CO <sub>2</sub> /Ar, 1200 mL min <sup>-1</sup> , 1 min, T=370 °C                                                         | 10%H <sub>2</sub> /Ar, 1200 mL min <sup>-1</sup> , 2 mins, T=370 °C          | 337                                            | 81.3                      | 99.3                     | 272                                           | 15    | 5    |
| Ru10Na <sub>2</sub> CO <sub>3</sub> /Al <sub>2</sub> O <sub>3</sub> (1 g)            | 1.4%CO <sub>2</sub> /Ar, 1200 mL min <sup>-1</sup> , 1 min, T=370 °C                                                         | 10%H <sub>2</sub> /Ar, 1200 mL min <sup>-1</sup> , 2 mins, T=370 °C          | 420                                            | 95.6                      | 99                       | 398                                           | 15    | 5    |
| Ni/AlCaO <sub>x</sub> (0.8 g)                                                        | 10%CO <sub>2</sub> /N <sub>2</sub> , 400 mL min <sup>-1</sup> , 5 mins, T=450 °C                                             | 30%H <sub>2</sub> /N <sub>2</sub> , 400 mL min <sup>-1</sup> , T=450 °C      | 1796                                           | –                         | –                        | 1790                                          | 10    | 6    |

|                                                                    |                                                                                                                                   |                                                                                                |                              |      |       |                              |    |              |
|--------------------------------------------------------------------|-----------------------------------------------------------------------------------------------------------------------------------|------------------------------------------------------------------------------------------------|------------------------------|------|-------|------------------------------|----|--------------|
| NaNO <sub>3</sub> -Ni/MgO-100-450 (0.5 g)                          | 65%CO <sub>2</sub> /N <sub>2</sub> , 200 mL min <sup>-1</sup> ,<br>15 mins, T=450 °C                                              | 50%H <sub>2</sub> /N <sub>2</sub> , 200 mL min <sup>-1</sup> ,<br>T=450 °C                     | 4580                         | –    | –     | 910                          | 5  | 7            |
| NiRu-CaO/CeO <sub>2</sub> -Al <sub>2</sub> O <sub>3</sub> (0.25 g) | 6.44%CO <sub>2</sub> /1.10%O <sub>2</sub> /2.47% H <sub>2</sub> O/N <sub>2</sub> ,<br>45 mL min <sup>-1</sup> , 15 mins, T=350 °C | 10%H <sub>2</sub> /N <sub>2</sub> , 45 mL min <sup>-1</sup> ,<br>15 mins, T=350 °C             | –                            | –    | 100   | 105                          | 8  | 8            |
| Ni/Ca(3)/HAP (1 g)                                                 | 10%CO <sub>2</sub> /Ar, 1200 mL min <sup>-1</sup> ,<br>1 min, T=400 °C                                                            | 10%H <sub>2</sub> /N <sub>2</sub> , 1200 mL min <sup>-1</sup> ,<br>2 mins, T=400 °C            | 157.5                        | –    | –     | 155                          | –  | 9            |
| Ni/Ca(3)/HAP (1 g)                                                 | 10%CO <sub>2</sub> /10%O <sub>2</sub> /Ar, 1200 mL min <sup>-1</sup> ,<br>1 min, T=400 °C                                         | 10%H <sub>2</sub> /N <sub>2</sub> , 1200 mL min <sup>-1</sup> ,<br>2 mins, T=400 °C            | –                            | –    | –     | 105                          | 5  | 9            |
| Na-Ru/Al <sub>2</sub> O <sub>3</sub> (2.3 cm <sup>3</sup> )        | 5%CO <sub>2</sub> /0.25%O <sub>2</sub> /1%H <sub>2</sub> O/N <sub>2</sub> , 20 Sl h <sup>-1</sup> ,<br>18 mins, T=300 °C          | 15%H <sub>2</sub> /N <sub>2</sub> , 20 Sl h <sup>-1</sup> ,<br>14 mins, T=300 °C               | 259                          | 89.1 | 99.73 | 183                          | 4  | 10           |
| Li-Ru/Al <sub>2</sub> O <sub>3</sub> (0.6 cm <sup>3</sup> )        | 5%CO <sub>2</sub> /0.25%O <sub>2</sub> /N <sub>2</sub> , 20 Sdm <sup>3</sup> h <sup>-1</sup> ,<br>18 mins, T=260 °C               | 15%H <sub>2</sub> /N <sub>2</sub> , 20 Sdm <sup>3</sup> h <sup>-1</sup> ,<br>14 mins, T=260 °C | 295 μmol<br>cm <sup>-3</sup> | 94   | –     | 189 μmol<br>cm <sup>-3</sup> | 3  | 11           |
| Ru-Ba/Al <sub>2</sub> O <sub>3</sub> (0.06 g)                      | 1%CO <sub>2</sub> /He, 100 mL (STP) min <sup>-1</sup> ,<br>10 mins, T=350 °C                                                      | 4%H <sub>2</sub> /He, 100 mL (STP)<br>min <sup>-1</sup> , 10 mins, T=350°C                     | –                            | –    | >98   | 153                          | 3  | 12           |
| K-Pt/Ni <sub>3</sub> Al <sub>1</sub> O <sub>x</sub> (0.3g)         | 5%CO <sub>2</sub> /5%O <sub>2</sub> /Ar, 200 mL min <sup>-1</sup> ,<br>5 mins, T=350°C                                            | 25%H <sub>2</sub> /Ar, 200 mL min <sup>-1</sup> ,<br>15 mins, T=350 °C                         | –                            | 63.9 | 97.4  | 359.5                        | –  | This<br>work |
| K-Pt/Ni <sub>3</sub> Al <sub>1</sub> O <sub>x</sub> (0.3 g)        | 5%CO <sub>2</sub> /500ppmNO <sub>x</sub> /5%O <sub>2</sub> /Ar,<br>200 mL min <sup>-1</sup> , 3 mins, T=350 °C                    | 25%H <sub>2</sub> /Ar, 200 mL min <sup>-1</sup> ,<br>5 mins, T=350 °C                          | –                            | 66.2 | >90   | 194.8                        | 10 | This<br>work |

**Table S4** The CO<sub>2</sub> capture capacity in 10-cycle CNSR test.

| Cycle number                                                     | 1     | 2     | 3     | 4     | 5     | 6     | 7     | 8     | 9     | 10    |
|------------------------------------------------------------------|-------|-------|-------|-------|-------|-------|-------|-------|-------|-------|
| C <sub>CO<sub>2</sub></sub> <sup>a</sup> (μmol g <sup>-1</sup> ) | 527.9 | 299.2 | 304.5 | 319.1 | 316.6 | 328.5 | 327.6 | 323.9 | 323.3 | 322.6 |

<sup>a</sup> CO<sub>2</sub> capture capacity, calculated by Eq. (S9)



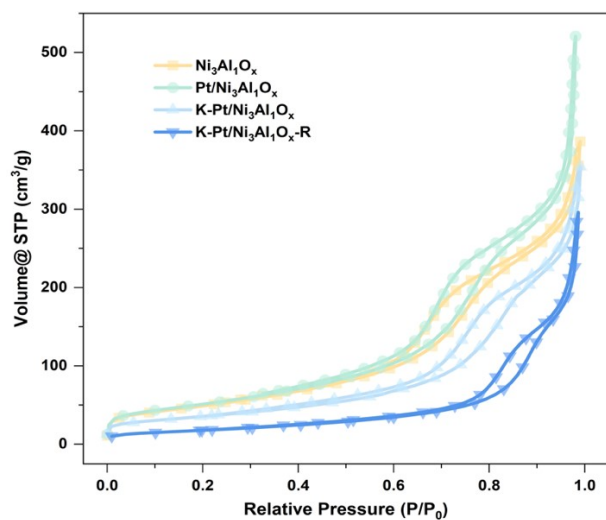

**Fig. S1.** N<sub>2</sub> adsorption and desorption isotherms of the prepared samples.

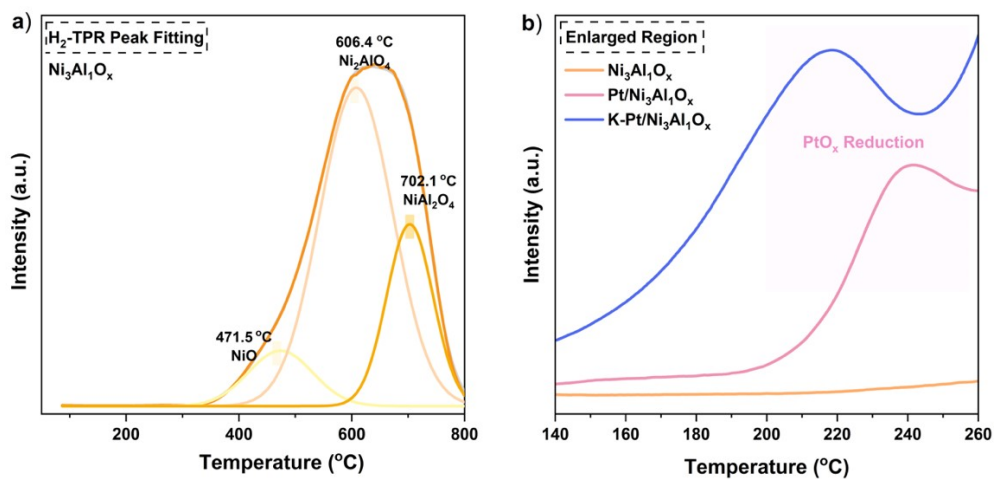

**Fig. S2.** (a) Deconvoluted H<sub>2</sub>-TPR traces (Gaussian peaks) obtained for Ni<sub>3</sub>Al<sub>1</sub>O<sub>x</sub> samples, (b) H<sub>2</sub>-TPR analyses of Ni<sub>3</sub>Al<sub>1</sub>O<sub>x</sub>, Pt/Ni<sub>3</sub>Al<sub>1</sub>O<sub>x</sub>, and K-Pt/Ni<sub>3</sub>Al<sub>1</sub>O<sub>x</sub> samples between 140 °C-260 °C.

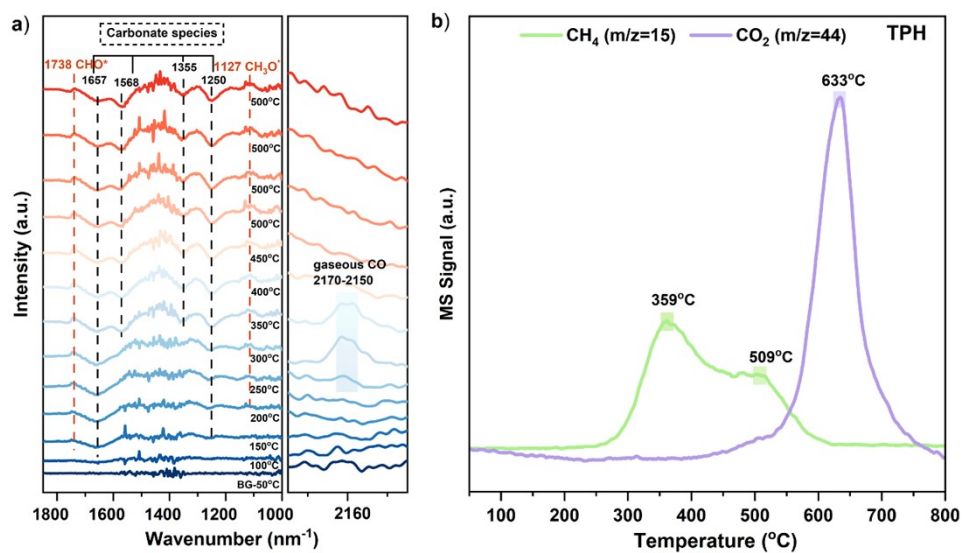

**Fig. S3.** (a) Temperature-dependent *in situ* DRIFT spectra of the pretreatment process and (b)  $\text{CH}_4$  and  $\text{CO}_2$  transient curve during TPH process for  $\text{K-Pt/Ni}_3\text{Al}_1\text{O}_x$ .

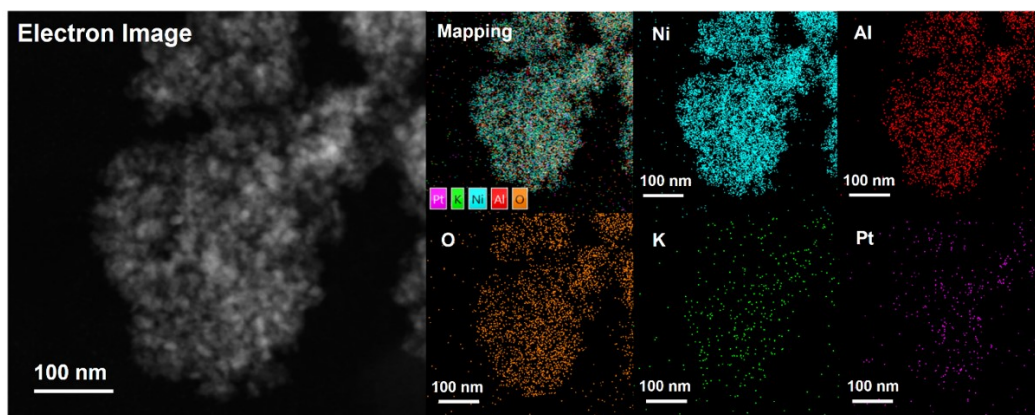

**Fig. S4.** TEM image and element distribution of Ni, Al, O, K, and Pt for K-Pt/Ni<sub>3</sub>Al<sub>1</sub>O<sub>x</sub>-R sample.

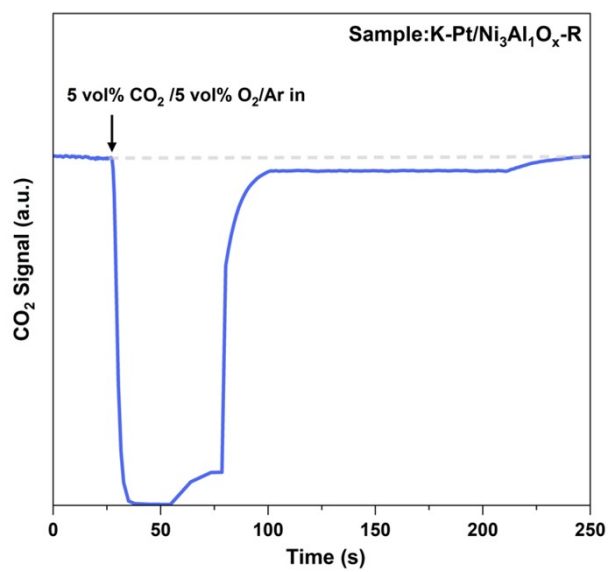

**Fig. S5.** 5% CO<sub>2</sub> breakthrough curve of K-Pt/Ni<sub>3</sub>Al<sub>1</sub>O<sub>x</sub>-R.

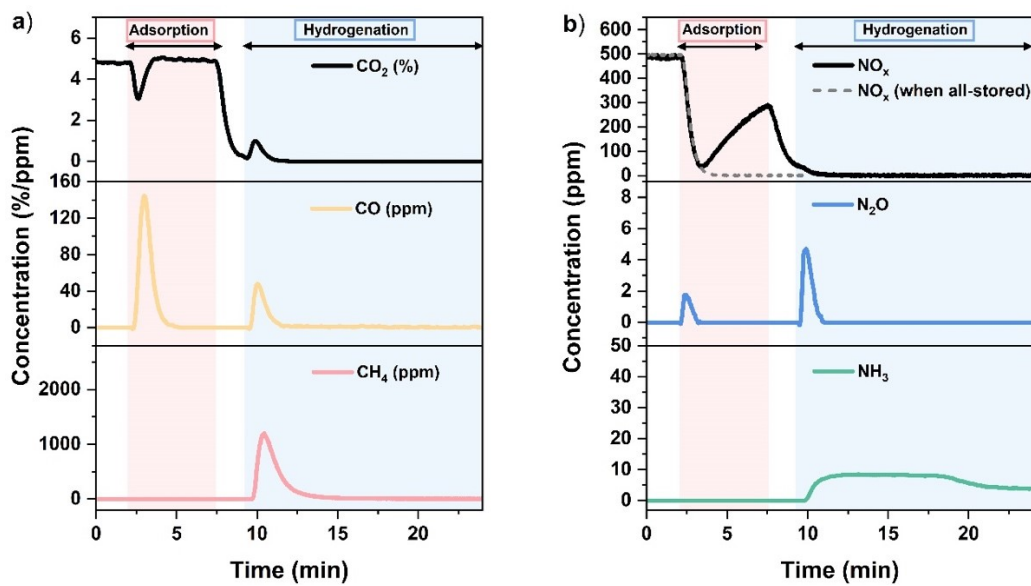

**Fig. S6.** Instantaneous concentration profiles of each gaseous component: (a) C-species and (b) N-species during CNSR process for the Pt/Ni<sub>3</sub>Al<sub>1</sub>O<sub>x</sub> sample.

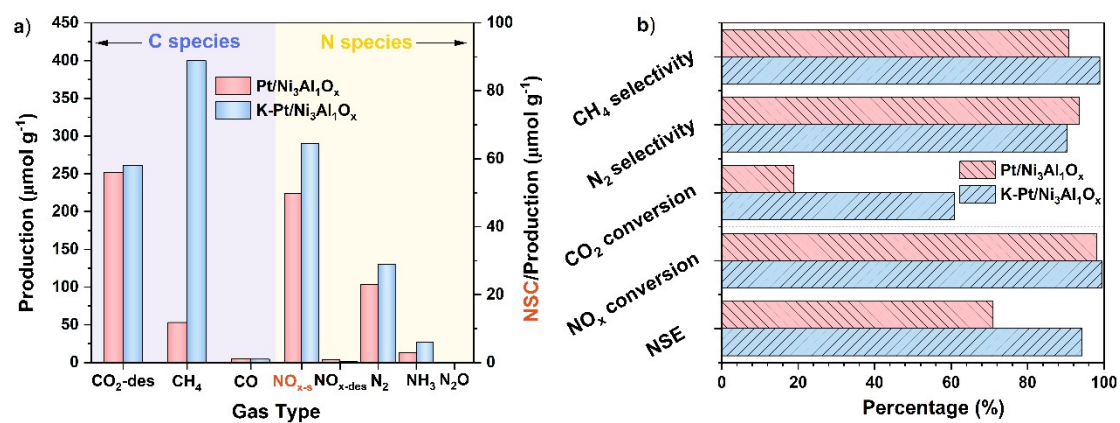

**Fig. S7.** Performance comparison between Pt/Ni<sub>3</sub>Al<sub>1</sub>O<sub>x</sub> and K-Pt/Ni<sub>3</sub>Al<sub>1</sub>O<sub>x</sub> samples: (a) storage capacity/production and (b) NO<sub>x</sub> storage efficiency (NSE), CO<sub>2</sub>, NO<sub>x</sub> conversion, and CH<sub>4</sub> and N<sub>2</sub> selectivity.

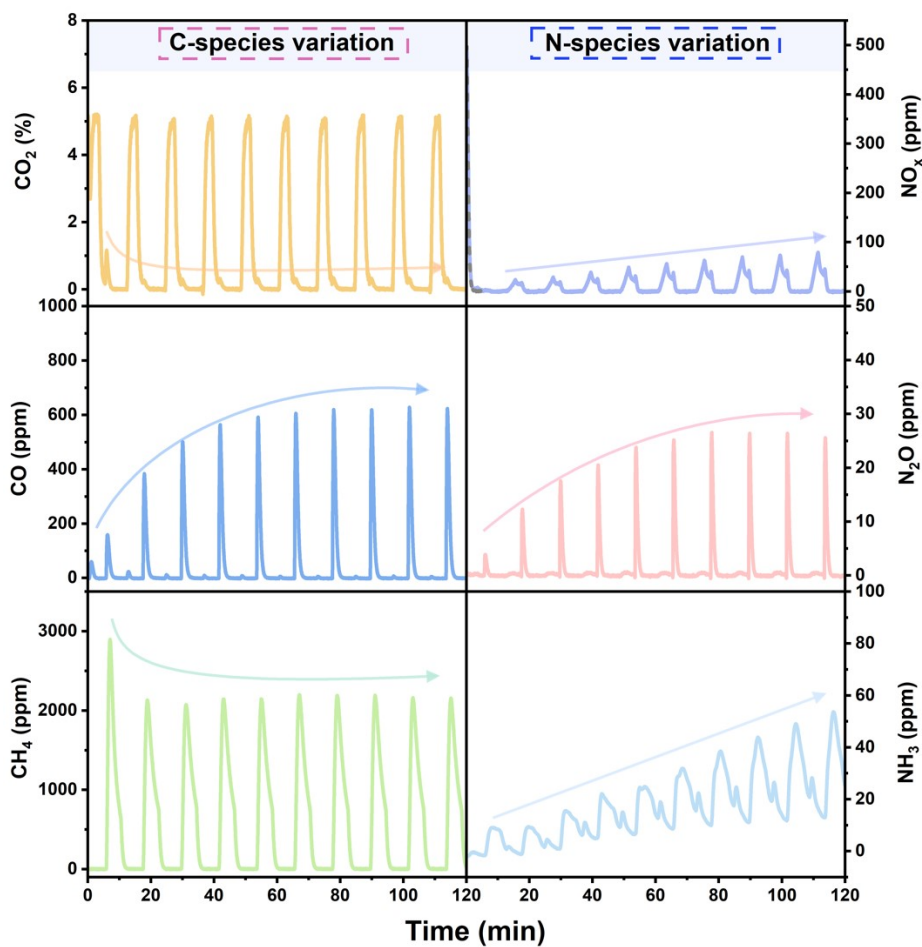

**Fig. S8.** The dynamic concentration curves of the involved gases over 10 cycles for K-Pt/Ni<sub>3</sub>Al<sub>1</sub>O<sub>x</sub> sample.



## Reference

1. H. Sun, Y. Zhang, C. Wang, M. A. Isaacs, A. I. Osman, Y. Wang, D. Rooney, Y. Wang, Z. Yan, C. M. A. Parlett, F. Wang and C. Wu, *Chemical Engineering Journal*, 2022, **437**, 135394.
2. A. Bermejo-Lopez, B. Pereda-Ayo, J. A. Gonzalez-Marcos and J. R. Gonzalez-Velasco, *Journal of CO<sub>2</sub> Utilization*, 2019, **34**, 576-587.
3. M. A. Arellano-Trevino, Z. He, M. C. Libby and R. J. Farrauto, *Journal of CO<sub>2</sub> Utilization*, 2019, **31**, 143-151.
4. A. Bermejo-López, B. Pereda-Ayo, J. A. Onrubia-Calvo, J. A. González-Marcos and J. R. González-Velasco, *Journal of CO<sub>2</sub> Utilization*, 2023, **67**, 102343.
5. A. Bermejo-López, B. Pereda-Ayo, J. A. González-Marcos and J. R. González-Velasco, *Applied Catalysis B: Environmental*, 2019, **256**, 117845.
6. L. Li, Y. Zhang, J. Feng, S. Zhao, K. Li, Z. Huang and H. Lin, *ACS Sustainable Chemistry & Engineering*, 2024, **12**, 925-937.
7. P. Huang, J. Chu, J. Fu, J. Yu, S. Li, Y. Guo, C. Zhao and J. Liu, *Chemical Engineering Journal*, 2023, **467**, 143431.
8. L.-P. Merkouri, L. F. Bobadilla, J. L. Martín-Espejo, J. A. Odriozola, A. Penkova, G. Torres-Sempere, M. Short, T. R. Reina and M. S. Duyar, *Applied Catalysis B: Environment and Energy*, 2025, **361**, 124610.
9. Z. Boukha, A. Bermejo-López, U. De-La-Torre and J. R. González-Velasco, *Applied Catalysis B: Environmental*, 2023, **338**, 122989.
10. S. Cimino, E. M. Cepollaro and L. Lisi, *Applied Catalysis B: Environmental*, 2022, **317**, 121705.
11. S. Cimino, E. M. Cepollaro, M. Pazzi and L. Lisi, *Catalysis Today*, 2024, **426**, 114366.
12. A. Porta, C. G. Visconti, L. Castoldi, R. Matarrese, C. Jeong-Potter, R. Farrauto and L. Lietti, *Applied Catalysis B: Environmental*, 2021, **283**, 119654.
